# Supplementary material
Source: PubMed Central journal article supplement (PMC7841790)
Supplement: ao0c04733_si_001.pdf [file ao0c04733_si_001.pdf]

## Supplementary Information:

# An electrochemical and surface characterization study on the corrosion inhibition of mild steel 1030 by the cationic surfactant cetrimonium trans-4- hydroxy-cinnamate

*Jhonatan Soto Puellas*<sup>a</sup>; *Mahdi Ghorbani*<sup>a</sup>; *Ruhamah Yunis*<sup>a</sup>; *Laura L. Machuca*<sup>b</sup>;

*Herman Terryn*<sup>c</sup>; *Maria Forsyth*<sup>\*a</sup>; *Anthony E. Somers*<sup>\*a</sup>;

<sup>a</sup> Institute of Frontier Materials, Deakin University, Burwood VIC 3125 Australia

<sup>b</sup> Corrosion Center for Education, Research and Technology (Corr-CERT), Curtin  
University, Kent Street, Bentley, WA 6102, Australia

<sup>c</sup> Department of Electrochemical and Surface Engineering (SURF), Vrije Universiteit  
Brussel, Pleinlaan 2, 1050 Brussels, Belgium

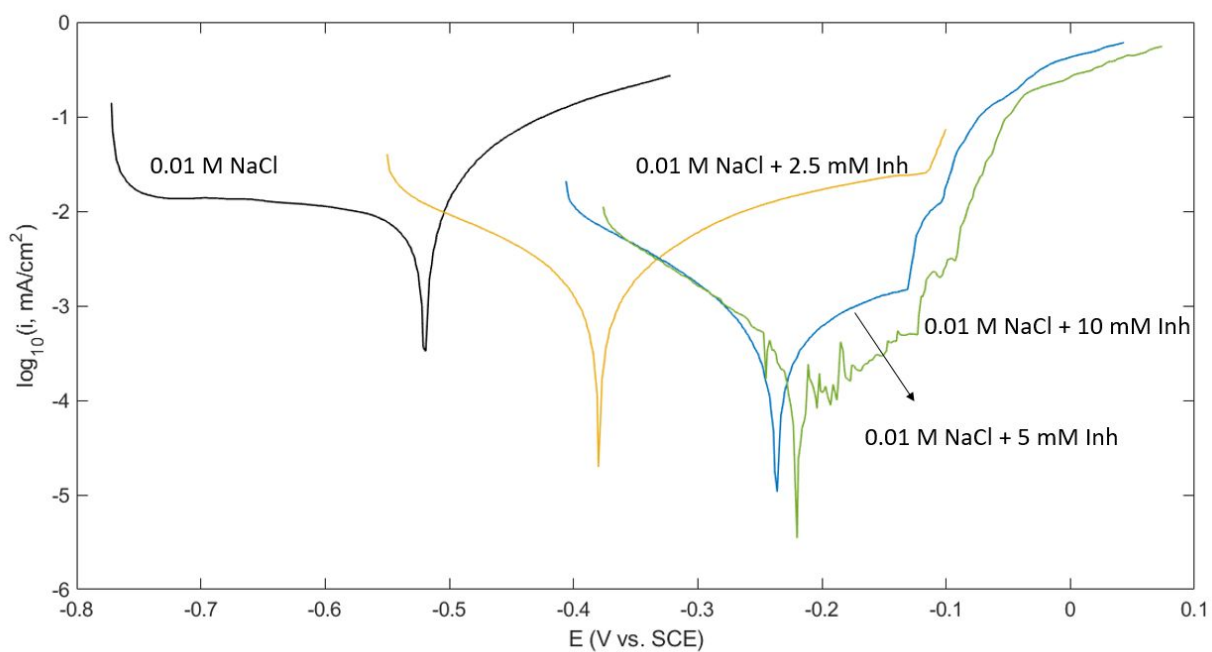

**Figure S1.** Replica for potentiodynamic polarization of mild steel immersed 24 hours in 0.01 M NaCl control (black line) and various concentrations of CTA-4OHcinn with their respective images.

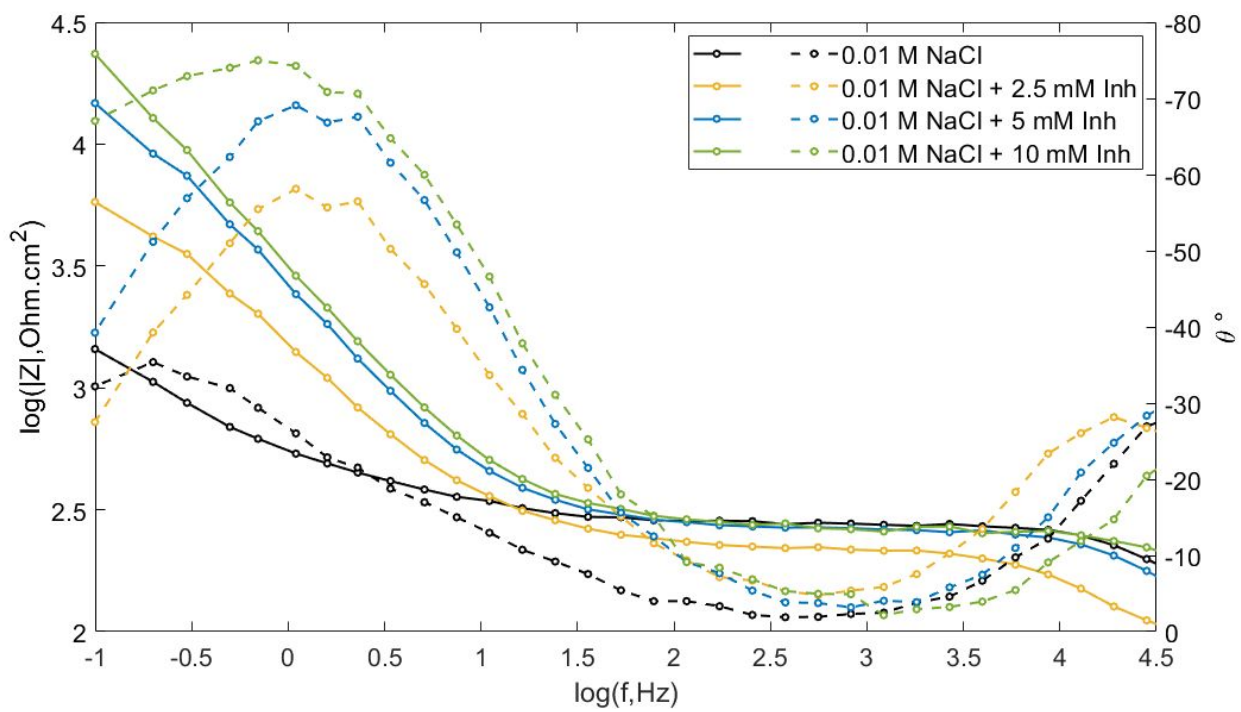

**Figure S2.** Impedance (solid lines) and phase angle (dashed lines) Bode plots for mild steel immersed 2 hours in different concentrations of inhibitor solution.

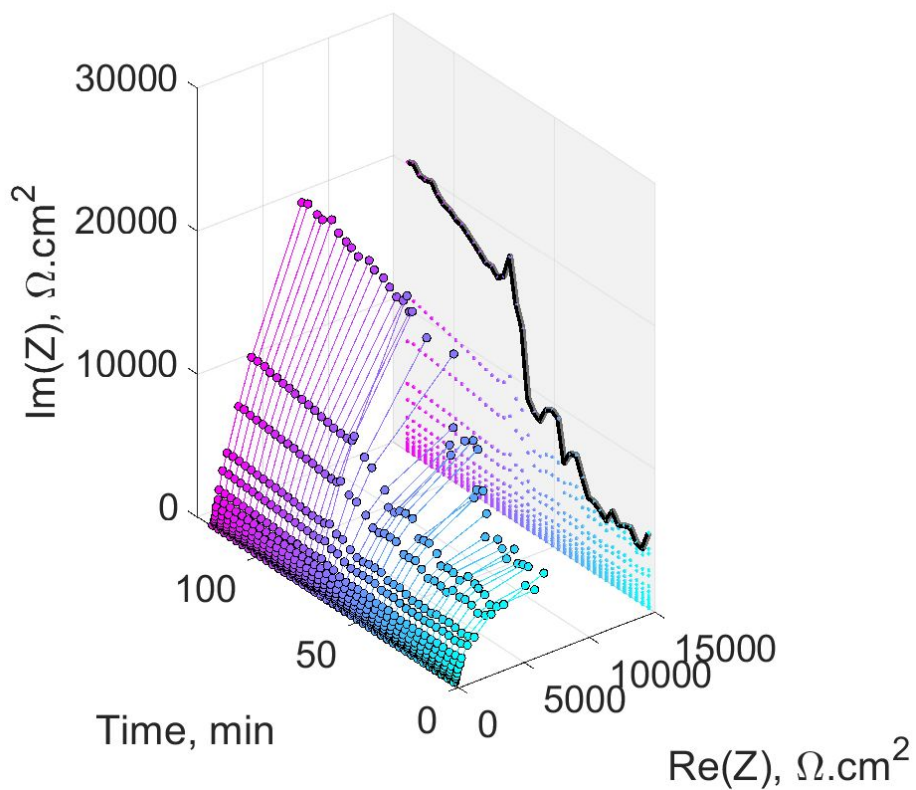

**Figure S3.** Time evolution of Nyquist plot for mild steel over the first 2 hours of immersion in 0.01 M NaCl + 10 mM CTA-4OHcinn.



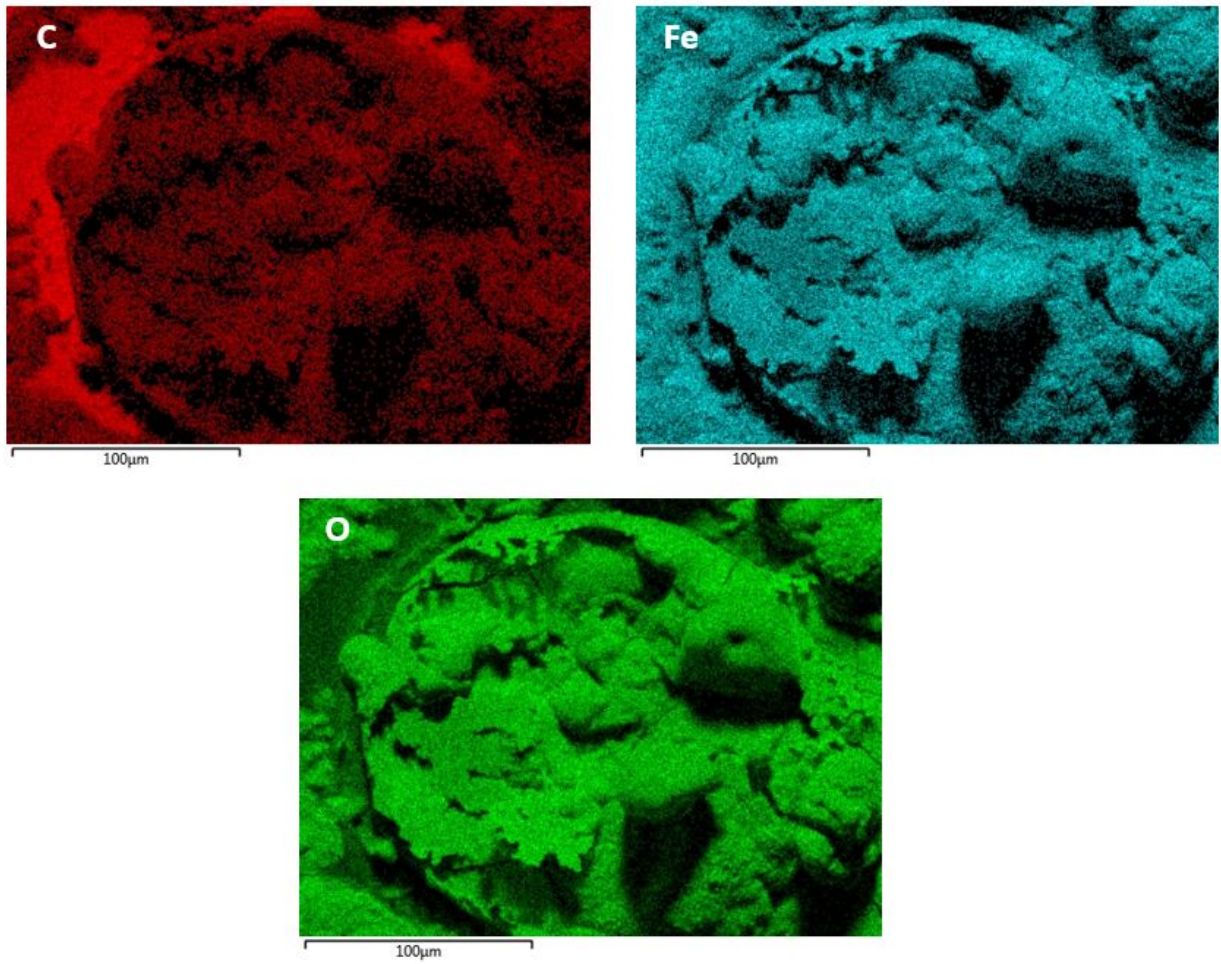

**Figure S4.** EDS map of the porous matrix formed on the metal surface after inhibitor interaction.
